# Supplementary material for: Identification of New Fusarium sulawense Strains Causing Soybean Pod Blight in China and Their Control Using Carbendazim, Dipicolinic Acid and Kojic Acid
Source: MDPI journal article supplement (doi:10.3390/ijerph191710531), 2022-08-24
Supplement: s1 [file s1]

### Figure S1

Agarose gel showing the amplicons of *ITS*, *EF1- $\alpha$*  and *RPB2* genes. The amplification conditions are detailed in the manuscript in Section 2.3.

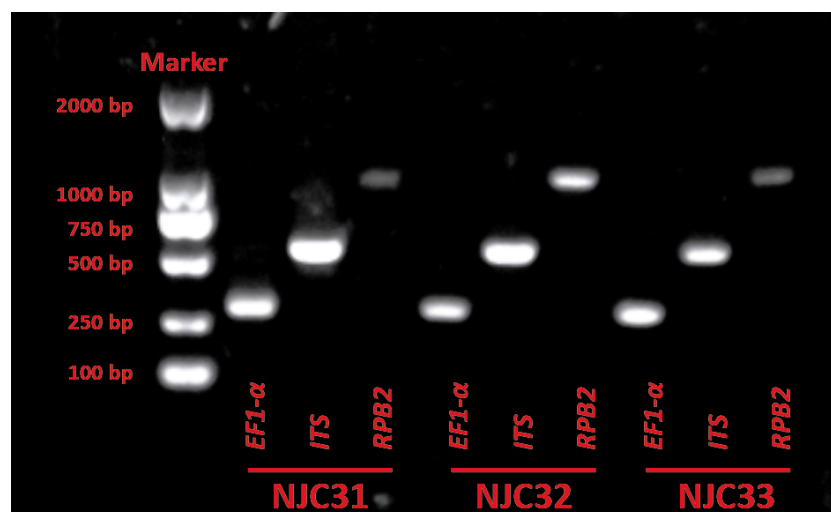

**Table S1**

Sequences of the *Fusarium sulawense* strains isolated from soybean pods in China

**ITS genes:**

**>ITS *Fusarium sulawense* NJC31**

ACCCCTGTGACATACCTATACGTTGCCTCGGCGGATCAGCCCGCGCCCCGTAAAACGGGA  
CGGCCCGCCCGAGGACCCCTAAACTCTGTTTTTAGTGGAACCTTCTGAGTAAAACAAACAA  
ATAAATCAAACTTTCAACAACGGATCTCTTGGTTCTGGCATCGATGAAGAACGCAGCAA  
AATGCGATAAGTAATGTGAATTGCAGAATTCAGTGAATCATCGAATCTTTGAACGCACAT  
TGCGCCCGCCAGTATTCTGGCGGGCATGCCTGTTTCGAGCGTCATTTCAACCCTCAAGCTC  
AGCTTGGTGTGGGACTCGCGGTAACCCGCGTTCCCCAAATCGATTGGCGGTACGTCGA  
GCTTCCATAGCGTAGTAATCATACACCTCGTTACTGGTAATCGTCGCGGCCACGCCGTTA  
AACCCCAACTTCTGAATGTTGACCTCGGATCAGGTAGGAATACCCGCTGAACTTAAGCAT  
ATCAATAA

**>ITS *Fusarium sulawense* NJC32**

CCTGTGACATACCTATACGTTGCCTCGGCGGATCAGCCCGCGCCCCGTAAAACGGGACGG  
CCCGCCCGAGGACCCCTAAACTCTGTTTTTAGTGGAACCTTCTGAGTAAAACAAACAAATA  
AATCAAACTTTCAACAACGGATCTCTTGGTTCTGGCATCGATGAAGAACGCAGCAAAAT  
GCGATAAGTAATGTGAATTGCAGAATTCAGTGAATCATCGAATCTTTGAACGCACATTGC  
GCCCGCCAGTATTCTGGCGGGCATGCCTGTTTCGAGCGTCATTTCAACCCTCAAGCTCAGC  
TTGGTGTGGGACTCGCGGTAACCCGCGTTCCCCAAATCGATTGGCGGTACGTCGAGCT  
TCCATAGCGTAGTAATCATACACCTCGTTACTGGTAATCGTCGCGGCCACGCCGTTAAAC  
CCCAACTTCTGAATGTTGACCTCGGATCAGGTAGGAATACCCGCTGAACTTAAGCATATC  
AATA

**>ITS *Fusarium sulawense* NJC33**

TCCCAACCCCTGTGACATACCTATACGTTGCCTCGGCGGATCAGCCCGCGCCCCGTAAA  
CGGGACGGCCCCGAGGACCCCTAAACTCTGTTTTTAGTGGAACCTTCTGAGTAAAACA  
AACAAATAAATCAAACTTTCAACAACGGATCTCTTGGTTCTGGCATCGATGAAGAACGC  
AGCAAAATGCGATAAGTAATGTGAATTGCAGAATTCAGTGAATCATCGAATCTTTGAACG  
CACATTGCGCCCGCCAGTATTCTGGCGGGCATGCCTGTTTCGAGCGTCATTTCAACCCTCA  
AGCTCAGCTTGGTGTGGGACTCGCGGTAACCCGCGTTCCCCAAATCGATTGGCGGTAC  
GTCGAGCTTCCATAGCGTAGTAATCATACACCTCGTTACTGGTAATCGTCGCGGCCACGC  
CGTTAAACCCCAACTTCTGAATGTTGACCTCGGATCAGGTAGGAATACCCGCTGAACTTA  
AGCATA

**EF1- $\alpha$  genes:**

**>EF1-a *Fusarium sulawense* NJC31**

CATCGAGAAGTTCGAGAAGGTTGGTTTCCATTTCCCGATCGCACGCCCTCTACCCACCG  
ATCCATCAGTCGAATCAGTTACGACGATTGAATATGCGCCTGTTACCCCGCTCGAGTACA  
AAATTTGCGGTTCAACCGTAATTTTTTTTGGTGGGGTTTCAACCCGCCACTCGAGCGA  
CAGACGTTTGCCCTCTTCCAGAAACCCATGTCTTGTGCATCACGTGTCCATCAGCCACT  
AACCACCCGACAAAGAGC

**>EF1-a *Fusarium sulawense* NJC32**

TCATCGAGAAGTTCGAGAAGGTTGGTTTCCATTTCCCCGATCGCACGCCGTCTACCCACC  
GATCCATCAGTCGAATCAGTTACGACGATTGAATATGCGCCTGTTACCCCGCTCGAGTAC  
AAAATTTTGCGGTTCAACCGTAATTTTTTTGGTGGGGTTTCAACCCCGCTACTCGAGCGA  
CAGACGTTTGCCCTCTTCCCACAACTCATGTCTCGTGCATCACGTGTCCATCAGCCACT  
AACCACCCGACA

**>EF1-a *Fusarium sulawense* NJC33**

TCATCGAGAAGTTCGAGAAGGTTGGTTTCCATTTCCCCGATCGCACGCCGTCTACCCACC  
GATCCATCAGTCGAATCAGTTACGACGATTGAATATGCGCCTGTTACCCCGCTCGAGTAC  
AAAATTTTGCGGTTCAACCGTAATTTTTTTGGTGGGGTTTCAACCCCGCTACTCGAGCGA  
CAGACGTTTGCCCTCTTCCCACAACTCATGTCTCGTGCATCACGTGTCCATCAGCCACT  
AACCACCCGACA

**RPB2 genes:**

**>RPB2 *Fusarium sulawense* NJC31**

CGACGTATGGATACTATGGCCAATATTCTCTACTATCCGCAAAAGCCTCTCGCCACCACC  
CGATCCATGGAGTTCCTCAAGTTTCGTGAATTGCCTGCCGGTCAGAACGCCATTGTTGCT  
ATCGCTTGTTATTCAGGATACAACCAGGAAGATTCCGTCATTATGAACCAGAGCAGTATT  
GATCGAGGCCTGTTCCGCAGTCTCTTCTTCCGATCATACTCGGATCAGGAGAAGAAGGTC  
GGTCTAAACTACACAGAAATCTTCGAGAAACCCCTTCCAACAAACAACACTGCGAATGAAG  
CATGGAACATACGACAAGCTCGACGAGGATGGTATTGTGGCTCCTGGTGTGCGAGTGTCA  
GGTGAAGATATCATTATTGGCAAGACTGCGCCTATCGACCAGGAGAATCAAGATCTCGGT  
ACCAGAACTCAGTCGCACCAGCGCCGCGATATCTCTACACCTCTGCGAAGTACAGAGAAC  
GGTATTGTTGATCAAGTCATCTTGACCGTCAACGCCGACAATGTCAAATACGTCAAGGTC  
CGAGTACGAACAACCAAGATCCCCCAAATTGGTGACAAGTTTGCTTCTCGTCACGGTCAA  
AAGGGTACAATCGGTGTAACCTACCGACAGGAGGATATGCCCTTCAGCAGAGAGGGTCTG  
ACTCCCGATATTATTATCAACCCTCACGCCATTCCATCTCGAATGACAATTGCCCATTTG  
ATTGAGTGTCTGCTAAGTAAAGTCTCAACACTTGAGGGTATGGAGGGTGACGCGACGCCC  
TTCACCGATGTCACTGTGATTCCGTGTGCGAACTTCTGAGAAAGCACGGCTACCAGTCT  
CGAGGTTTCGAGGTTATGTACAATGGTCACACTGGACGTAAGCTCCGCGCCCAGGTCTTC  
TTTGACCTACATACTACCAACGACTTCGTCACATGGT

**>RPB2 *Fusarium sulawense* NJC32**

AGCCACCACCAGATCCATGGAGTTCCTCAAGTTCCGTGAATTGCCTGCTGGTCAGAACGC  
CATTGTTGCTATCGCTTGTTATTCAGGATACAACCAGGAAGATTCCGTCATTATGAACCA  
GAGCAGTATTGACCGAGGCCTGTTCCGCAGTCTCTTCTTCCGATCATACTCGGATCAGGA  
GAAGAAGGTCGGTCTAAACTACACAGAAATCTTCGAGAAGCCCTTCCAACAAACAACGCT  
TCGAATGAAGCATGGAACATACGACAAGCTCGACGAGGATGGTATTGTGGCTCCTGGTGT  
GCGAGTGTGAGGTGAAGATATCATATTGGCAAGACTGCGCCTATCGACCAAGAGAATCA  
AGATCTCGGTACCAGAACTCAGTCGCACCAGCGCCGCGATATCTCTACACCTCTGCGAAG  
TACAGAGAACGGTATTGTTGATCAAGTCATTTTGACCGTCAACGCCGACAATGTCAAATA  
CGTCAAGGTCCGAGTACGAACAACCAAGATCCCCCAGATTGGTGACAAGTTTGCTTCTCG

TCACGGTCAAAAGGGTACAATCGGTGTAACCTACCGACAGGAGGATATGCCCTTCAGCAG  
AGAGGGTCTGACTCCCGATATTATTATCAACCCTCACGCCATTCCATCTCGAATGACAAT  
TGCCCATTTGATTGAGTGTCTGCTAAGTAAAGTCTCAACACTTGAGGGTATGGAGGGTGA  
CGCGACGCCCTTTACCGATGTCAGTGTGCGATTCCGTGTCGGAACCTTCTGAGAAAGCACGG  
CTACCAGTCTCGAGGTTTCGAGGTTATGTACAATGGTCACACTGGACGTAAGCTCCGCGC  
CCAAGTCTTCTTTGGACCTACATACTACCAGCGACTTCGTCACATGGGTCGACGA

**>RPB2 *Fusarium sulawense* NJC33**

GCCACCACCAGATCCATGGAGTTCCTCAAGTTCCGTGAATTGCCTGCTGGTCAGAACGCC  
ATTGTTGCTATCGCTTGTTATTCAGGATACAACCAGGAAGATTCCGTCAATTATGAACCAG  
AGCAGTATTGACCGAGGCCTGTTCCGCAGTCTCTTCTTCCGATCATACTCGGATCAGGAG  
AAGAAGGTCGGTCTAAACTACACAGAAATCTTCGAGAAGCCCTTCCAACAAACAACGCTT  
CGAATGAAGCATGGAACATACGACAAGCTCGACGAGGATGGTATTGTGGCTCCTGGTGTG  
CGAGTGTGAGGTGAAGATATCATCATTGGCAAGACTGCGCCTATCGACCAAGAGAATCAA  
GATCTCGGTACCAGAACTCAGTCGCACCAGCGCCGCGATATCTCTACACCTCTGCGAAGT  
ACAGAGAACGGTATTGTTGATCAAGTCATTTTGACCGTCAACGCCGACAATGTCAAATAC  
GTCAAGGTCCGAGTACGAACAACCAAGATCCCCCAGATTGGTGACAAGTTTGCTTCTCGT  
CACGGTCAAAAGGGTACAATCGGTGTAACCTACCGACAGGAGGATATGCCCTTCAGCAGA  
GAGGGTCTGACTCCCGATATTATTATCAACCCTCACGCCATTCCATCTCGAATGACAATT  
GCCCATTTGATTGAGTGTCTGCTAAGTAAAGTCTCAACACTTGAGGGTATGGAGGGTGAC  
GCGACGCCCTTTACCGATGTCAGTGTGCGATTCCGTGTCGGAACCTTCTGAGAAAGCACGGC  
TACCAGTCTCGAGGTTTCGAGGTTATGTACAATGGTCACACTGGACGTAAGCTCCGCGCC  
CAAGTCTTCTTTGGACCTACATACTACCAGCGACTTCGTCACATGG
